# Supplementary material
Source: publisher site journal article supplement (https://www.dovepress.com/article/366436)

**Fig. S1** Knockdown of GSDMD mitigates the sepsis-induced lung injury in mice. A. The relative expression of NLRP3, caspase-1, caspase-1 p20, GSDMD, and N-GSDMD in the different groups of the lung tissues was determined by Western blot. B. Pathological injuries in the lungs from different groups shown in H&E staining. Scale bar, 50  $\mu$ m and 100  $\mu$ m. C. Representative NLRP3 IHC staining images in lung tissues are shown. Scale bar, 50  $\mu$ m and 100  $\mu$ m. For all experiments, data are presented as the mean  $\pm$  SD, one-way ANOVA was used for statistical analysis, n = 6 per group, ns = not significant, \*P < 0.05, \*\*P < 0.01.

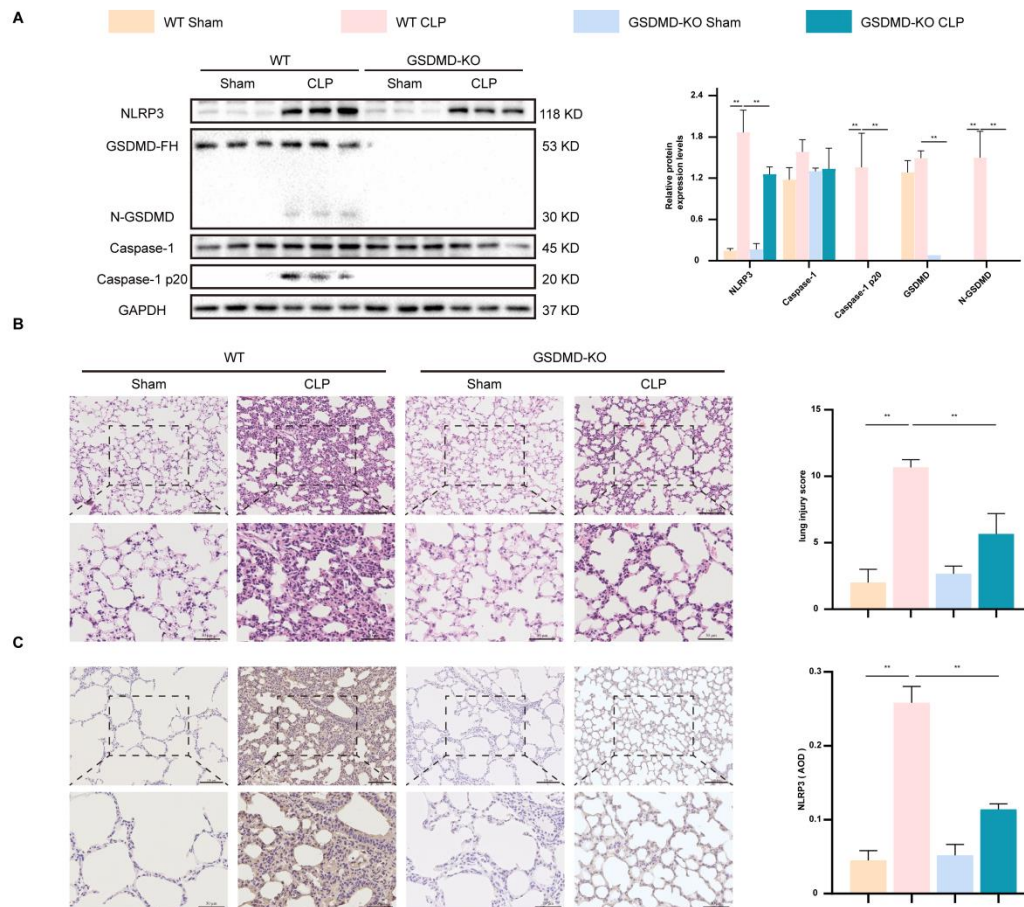

Supplement: Supplementary file 1 [file get_supplementary_file.php]
